# Supplementary material
Source: PubMed Central journal article supplement (PMC9896373)
Supplement: jamaoncol-e227146-s001.pdf [file jamaoncol-e227146-s001.pdf]

## Supplementary Online Content

Eckhert E, Lansinger O, Ritter V, et al. Breast cancer diagnosis, treatment, and outcomes of patients from sex and gender minority groups. *JAMA Oncol*. Published online February 2, 2023. doi:10.1001/jamaoncol.2022.7146

**eTable 1.** Percentage of Patients From SGM Groups With Breast Cancer Identified by Search Term

**eTable 2.** Medical History of Patients From SGM Groups and Cisgender Heterosexual Breast Cancer Patients

**eTable 3.** Hormonal Risk Factors of Patients From SGM Groups and Cisgender Heterosexual Breast Cancer Patients

**eTable 4.** Breast Cancer Screening and Diagnosis of Patients From SGM Groups and Cisgender Heterosexual Breast Cancer Patients

**eTable 5.** Genetic Testing and Clinical Trial Enrollment of Patients From SGM Groups and Cisgender Heterosexual Breast Cancer Patients

**eTable 6.** Breast Cancer Treatment and Recurrence of Patients From SGM Groups and Cisgender Heterosexual Breast Cancer Patients

**eTable 7.** Benjamini-Hochberg Corrected *P* Values for Prespecified Metrics

**eTable 8.** Adjusted Association Between Race and Sex and Gender Minority Outcomes

This supplementary material has been provided by the authors to give readers additional information about their work.

**eTable 1.** Percentage of Patients From SGM Groups With Breast Cancer Identified by Search Term

| Search term <sup>a</sup> , n <sup>b</sup> (% <sup>c</sup> ) |         |
|-------------------------------------------------------------|---------|
| LGBTQ+ Identity Search, n (%)                               | 20 (22) |
| SGM Behavior Search, n (%)                                  | 78 (85) |
| LGBT ICD10, n (%)                                           | 4 (4)   |

<sup>a</sup> Identity search terms: lesbian, gay, homosexual, bisexual, queer, transgender, transexual, transsexual, male to female, MTF, female to male, FTM, gender nonconforming, gender fluid, nonbinary. Behavioral search terms in patients with sex listed as female: same sex, female partner(s), wife, girlfriend, women who have sex with women, WSW. Behavioral search terms in patients with sex listed as male: same sex, male partner(s), husband, boyfriend, men who have sex with men, MSM. ICD10 search terms: 302 sexual and gender identity disorders, 302.0 ego-dystonic sexual orientation, 302.5 transsexualism, F64 gender identity disorders, F64.0 transsexualism, F64.1 dual role transvestism, Z72.52 high risk homosexual behavior.

<sup>b</sup> SGM patients overlapped between searches

<sup>c</sup> After this initial search, charts were manually reviewed to identify false positives. Reasons for false positives included names (e.g., nurse Gay), medical terms (e.g., trans-fats), identities or behaviors of family members (e.g., a lesbian daughter), slurs used by patients directed at staff members, patient requests for same-sex providers, the presence of SGM screening questionnaires in the chart, and lack of specificity of some ICD-10 codes (e.g., 302: sexual and gender identity disorders).

**eTable 2.** Medical History of Patients From SGM Groups and Cisgender Heterosexual Breast Cancer Patients

| <b>Characteristic</b>              | <b>SGM (n=92)</b> | <b>Cis-Het (n=92)</b> | <b>Difference (95% CI)<sup>a</sup></b> |
|------------------------------------|-------------------|-----------------------|----------------------------------------|
| Diabetes, n (%)                    | 5 (5.4)           | 9 (9.8)               | -4.3 (-13 to 4.4)                      |
| Coronary artery disease, n (%)     | 7 (7.6)           | 2 (2.2)               | 5.4 (-1.8 to 13)                       |
| Obesity, n (%)                     | 37 (40)           | 32 (35)               | 5.4 (-9.6 to 20)                       |
| Tobacco use, n (%)                 |                   |                       |                                        |
| Current                            | 10 (11)           | 9 (9.8)               | 1.1 (-8.8 to 11)                       |
| Former                             | 25 (27)           | 18 (20)               | 7.6 (-5.7 to 21)                       |
| Alcohol use n (%)                  |                   |                       |                                        |
| Routine use                        | 55 (60)           | 55 (60)               | 0.00 (-14 to 14)                       |
| At-Risk use <sup>b</sup>           | 12 (13)           | 4 (4.3)               | 8.7 (-0.44 to 18)                      |
| Cannabis use, n (%)                | 23 (25)           | 7 (7.6)               | 17 (5.9 to 29)                         |
| Other illicit substance use, n (%) | 3 (3.3)           | 0 (0)                 | 3.3 (-1.5 to 8.0)                      |

Abbreviations: cisgender heterosexual (Cis-Het), confidence interval (CI), sexual gender minority (SGM)

<sup>a</sup> Median difference; difference in proportions

<sup>b</sup> At-risk alcohol use, as defined by the US Department of Health and Human Services for women, is more than 3 drinks per day or more than 7 drinks per week<sup>30</sup>

**eTable 3.** Hormonal Risk Factors of Patients From SGM Groups and Cisgender Heterosexual Breast Cancer Patients

| <b>Characteristic</b>                                                                                                                                                                                                                                       | <b>SGM (n=92)</b> | <b>Cis-Het (n=92)</b> | <b>Difference (95% CI)<sup>a</sup></b> |
|-------------------------------------------------------------------------------------------------------------------------------------------------------------------------------------------------------------------------------------------------------------|-------------------|-----------------------|----------------------------------------|
| Age at menarche, Median (IQR)                                                                                                                                                                                                                               | 12.50 (12 – 14)   | 12.50 (12 – 13)       | 0.09 (-0.36 to 0.54)                   |
| Age at menopause, Median (IQR)                                                                                                                                                                                                                              | 50 (46 – 52)      | 50 (46 – 52)          | 1.2 (-2.2 to 4.5)                      |
| Nulligravida, n (%)                                                                                                                                                                                                                                         | 59 (64)           | 16 (17)               | 47 (33 to 60)                          |
| Number of children delivered, Median (IQR)                                                                                                                                                                                                                  | 0 (0 – 0)         | 2 (0 – 2)             | -1.2 (-1.5 to -0.84)                   |
| Age at first delivery, Median (IQR)                                                                                                                                                                                                                         | 27 (22 – 35)      | 27 (21 – 32)          | 1.9 (-2.3 to 6.0)                      |
| Ever use of HRT, n (%)                                                                                                                                                                                                                                      | 15 (16)           | 15 (16)               | 0.00 (-11 to 11)                       |
| Ever use of OC, n (%)                                                                                                                                                                                                                                       | 48 (52)           | 56 (61)               | -8.7 (-24 to 6.7)                      |
| Abbreviations: cisgender heterosexual (Cis-Het), confidence interval (CI), hormone replacement therapy (HRT), interquartile range (IQR), oral contraceptive (OC), sexual gender minority (SGM)<br><sup>a</sup> Median difference; difference in proportions |                   |                       |                                        |

**eTable 4.** Breast Cancer Screening and Diagnosis of Patients From SGM Groups and Cisgender Heterosexual Breast Cancer Patients

| <b>Characteristic</b>                                                                                                              | <b>SGM<br/>(n=92)</b> | <b>Cis-Het<br/>(n=92)</b> | <b>Difference<br/>(95% CI)<sup>a</sup></b> |
|------------------------------------------------------------------------------------------------------------------------------------|-----------------------|---------------------------|--------------------------------------------|
| Missed guideline-based screening, n (%) <sup>b</sup>                                                                               | 19 (23)               | 18 (20)                   | 2.4 (-11 to 16)                            |
| Time from symptom onset to diagnosis,<br>Median (IQR) <sup>b</sup>                                                                 | 64 (32 –<br>118)      | 34 (16 –<br>75)           | 56 (-2.9 to 116)                           |
| Diagnosed by screening, n (%)                                                                                                      | 37 (40)               | 36 (39)                   | 1.1 (-14 to 16)                            |
| Symptoms detected by, n (%)                                                                                                        |                       |                           |                                            |
| Patient                                                                                                                            | 44 (86)               | 49 (94)                   | -8.0 (-21 to 5.4)                          |
| Family                                                                                                                             | 2 (3.9)               | 1 (1.9)                   | 2.0 (-6.4 to 10)                           |
| Healthcare                                                                                                                         | 5 (9.8)               | 2 (3.8)                   | 6.0 (-5.7 to 18)                           |
| Abbreviations: cisgender heterosexual (Cis-Het), confidence interval (CI), interquartile range (IQR), sexual gender minority (SGM) |                       |                           |                                            |
| <sup>a</sup> Median difference; difference in proportions                                                                          |                       |                           |                                            |
| <sup>b</sup> Primary outcomes used in adjusted analyses                                                                            |                       |                           |                                            |

**eTable 5.** Genetic Testing and Clinical Trial Enrollment of Patients From SGM Groups and Cisgender Heterosexual Breast Cancer Patients

| <b>Characteristic</b>                                                                                                                                                                                                                                                                                                                                                                                                                  | <b>SGM<br/>(n=92)</b> | <b>Cis-Het<br/>(n=92)</b> | <b>Difference (95%<br/>CI)<sup>a</sup></b> |
|----------------------------------------------------------------------------------------------------------------------------------------------------------------------------------------------------------------------------------------------------------------------------------------------------------------------------------------------------------------------------------------------------------------------------------------|-----------------------|---------------------------|--------------------------------------------|
| Appropriate <sup>b</sup> referral to genetic testing, n (%)                                                                                                                                                                                                                                                                                                                                                                            | 46 (84)               | 43 (75)                   | 8.2 (-8.4 to 25)                           |
| Offered genetic testing, n (%)                                                                                                                                                                                                                                                                                                                                                                                                         | 70 (76)               | 54 (59)                   | 17 (3.0 to 32)                             |
| Approached for clinical trial, n (%)                                                                                                                                                                                                                                                                                                                                                                                                   | 38 (41)               | 28 (30)                   | 11 (-4.0 to 26)                            |
| Enrolled in clinical trial, n (%)                                                                                                                                                                                                                                                                                                                                                                                                      | 36 (39)               | 26 (28)                   | 11 (-3.8 to 26)                            |
| Enrolled in clinical trial of a treatment, n (%)                                                                                                                                                                                                                                                                                                                                                                                       | 19 (21)               | 11 (12)                   | 8.7 (-3.0 to 20)                           |
| Number of studies (if any enrolled), Median (IQR)                                                                                                                                                                                                                                                                                                                                                                                      | 1 (1 – 3)             | 2 (1 – 3)                 | -0.19 (-0.73 to 0.35)                      |
| <p>Abbreviations: cisgender heterosexual (Cis-Het), confidence interval (CI), interquartile range (IQR), sexual gender minority (SGM)</p> <p><sup>a</sup> Median difference; difference in proportions</p> <p><sup>b</sup> Appropriate referrals to genetic counseling and testing, as specified by NCCN, are referrals for triple negative patients or those diagnosed with breast cancer under the age of 50 years.<sup>25</sup></p> |                       |                           |                                            |

**eTable 6.** Breast Cancer Treatment and Recurrence of Patients From SGM Groups and Cisgender Heterosexual Breast Cancer Patients

| Characteristic                                                                                                                                                                                 | SGM<br>(n=92) | Cis-Het<br>(n=92) | Difference<br>(95% CI) <sup>a</sup> |
|------------------------------------------------------------------------------------------------------------------------------------------------------------------------------------------------|---------------|-------------------|-------------------------------------|
| Declined recommended treatment, n (%) <sup>b</sup>                                                                                                                                             | 35 (38)       | 18 (20)           | 18 (4.3 to 32)                      |
| Time from diagnosis to treatment, Median (IQR) <sup>b</sup>                                                                                                                                    | 31 (22 – 49)  | 30 (20 – 48)      | 1.9 (-7.5 to 11)                    |
| Recurrence, n (%) <sup>b,c</sup>                                                                                                                                                               | 29 (32)       | 12 (13)           | 19 (5.8 to 32)                      |
| Time (in months) from diagnosis to recurrence, Median (IQR) <sup>b,c</sup>                                                                                                                     | 41 (18 – 69)  | 27 (17 – 51)      | -2.2 (-54 to 49)                    |
| Lumpectomy, n (%) <sup>b</sup>                                                                                                                                                                 | 49 (54)       | 49 (55)           | -1.2 (-17 to 14)                    |
| Mastectomy, n (%)                                                                                                                                                                              | 42 (46)       | 40 (45)           | 1.2 (-14 to 17)                     |
| Chest reconstruction, n (%) <sup>b</sup>                                                                                                                                                       | 29 (55)       | 44 (83)           | -28 (-47 to -9.6)                   |
| Neoadjuvant chemo for Stage III, n (%) <sup>b</sup>                                                                                                                                            | 10 (53)       | 10 (48)           | 5.0 (-31 to 41)                     |
| Prophylactic contralateral mastectomy, n (%)                                                                                                                                                   | 32 (36)       | 22 (26)           | 10 (-4.3 to 25)                     |
| Anti-estrogen for at least 5 years for ER+, n (%)                                                                                                                                              | 27 (52)       | 40 (73)           | -21 (-41 to -1.0)                   |
| HER-2 drug for HER-2+, n (%)                                                                                                                                                                   | 10 (77)       | 10 (83)           | -6.4 (-44 to 31)                    |
| Adjuvant radiation after lumpectomy, n (%)                                                                                                                                                     | 31 (94)       | 38 (95)           | -1.1 (-13 to 11)                    |
| Alternative medicine use, n (%)                                                                                                                                                                | 42 (46)       | 28 (30)           | 15 (0.3 to 30)                      |
| Alternative medication users who refused treatment, n (%)                                                                                                                                      | 19 (45)       | 7 (25)            | 20 (-4.7 to 45)                     |
| Most used alternative medications                                                                                                                                                              |               |                   |                                     |
| Cannabis, n (%)                                                                                                                                                                                | 26 (60)       | 7 (25)            | 35 (11 to 60)                       |
| Flaxseed, n (%)                                                                                                                                                                                | 7 (16)        | 7 (25)            | -8.7 (-31 to 14)                    |
| Lutein, n (%)                                                                                                                                                                                  | 5 (12)        | 4 (14)            | -2.7 (-21 to 16)                    |
| Turmeric, n (%)                                                                                                                                                                                | 4 (9.3)       | 1 (3.6)           | 5.7 (-8.3 to 20)                    |
| Biotin, n (%)                                                                                                                                                                                  | 1 (2.3)       | 2 (7.1)           | -4.8 (-18 to 8.7)                   |
| Garlic, n (%)                                                                                                                                                                                  | 3 (7.0)       | 1 (3.6)           | 3.4 (-9.8 to 17)                    |
| Abbreviations: chemotherapy (chemo), cisgender heterosexual (Cis-Het), confidence interval (CI), interquartile range (IQR), sexual gender minority (SGM)                                       |               |                   |                                     |
| <sup>a</sup> Median difference; difference in proportions                                                                                                                                      |               |                   |                                     |
| <sup>b</sup> Primary outcome used in adjusted analyses                                                                                                                                         |               |                   |                                     |
| <sup>c</sup> The number of patients included in this statistic is 90 for both SGM and Cis-Het patients because there were two patients in each group with Stage IV breast cancer at diagnosis. |               |                   |                                     |

**eTable 7.** Benjamini-Hochberg Corrected *P* Values for Prespecified Metrics

| <b>Outcome</b>                                 | <b>B-H Corrected p-value</b> |
|------------------------------------------------|------------------------------|
| Missed guideline-based screening               | 0.89                         |
| Appropriate referral to genetic testing        | 0.89                         |
| Mastectomy                                     | 0.89                         |
| Chest reconstruction                           | 0.44                         |
| Adjuvant radiation after lumpectomy            | 0.89                         |
| Neoadjuvant chemo for Stage III                | 0.89                         |
| Anti-estrogen for at least 5 years for ER+     | 0.44                         |
| HER-2 drug for HER-2+                          | >0.99                        |
| Declined oncologist recommended treatment      | 0.17 <sup>a</sup>            |
| Time (in days) from symptom onset to diagnosis | 0.17 <sup>a</sup>            |
| Time (in days) from diagnosis to treatment     | 0.89                         |
| Time (in months) from diagnosis to recurrence  | 0.014 <sup>a</sup>           |

Abbreviations: Benjamini-Hochberg (B-H), Estrogen receptor-positive (ER+), HER-2 positive (HER-2+)  
<sup>a</sup> Deemed as significant after Benjamini-Hochberg correction with FDR of 20%



**eTable 8.** Adjusted Association Between Race and Sex and Gender Minority Outcomes

| Outcome                                        | Adjusted Effect (95% CI) |                             |
|------------------------------------------------|--------------------------|-----------------------------|
|                                                | All patients             | White Non-Hispanic patients |
| Declined oncologist recommended treatment      | 2.3 (1.1 to 4.7)         | 2.6 (0.9 to 7.7)            |
| Time (in days) from symptom onset to diagnosis | 0.6 (0.4 to 1.0)         | 0.7 (0.4 to 1.2)            |
| Time (in months) from diagnosis to recurrence  | 3.1 (1.6 to 6.0)         | 3.3 (1.5 to 7.3)            |

Abbreviations: confidence interval (CI)
