# Supplementary material
Source: PubMed Central journal article supplement (PMC9896373)
Supplement: jamaoncol-e227146-s002.pdf [file jamaoncol-e227146-s002.pdf]

## Data Sharing Statement

Eckhert. Breast Cancer Diagnosis, Treatment, and Outcomes of Patients From Sex and Gender Minority Groups. *JAMA Oncol.* Published February 02, 2023.

doi:10.1001/jamaoncol.2022.7146

### Data

**Data available:** Yes

**Data types:** Deidentified participant data

**How to access data:** Available by request to PI

**When available:** With publication

### Supporting Documents

**Document types:** None

### Additional Information

**Who can access the data:** Researchers who provide a methodologically sound proposal

**Types of analyses:** To achieve aims in the approved proposal

**Mechanisms of data availability:** With investigator support

**Any additional restrictions:** None
